# Supplementary material for: Inhibition of Clinical MRSA Isolates by Coagulase Negative Staphylococci of Human Origin
Source: MDPI journal article supplement (doi:10.3390/antibiotics13040338), 2024-04-08
Supplement: s1 [file s1]

**Table S.1.** Summary of activity observed from isolates shortlisted for whole genome sequencing.

| Isolate | Deferred antagonism assay                                                                            | Biofilm inhibition                                                    | Growth inhibition of MRSA M at T12 |
|---------|------------------------------------------------------------------------------------------------------|-----------------------------------------------------------------------|------------------------------------|
| C14     | • Inhibition of <i>M. luteus</i> and MRSA strains G and R                                            | • Significant inhibition of MRSA, V, R, M, and E biofilm formation    | Yes                                |
| C33     | • Inhibition of <i>M. luteus</i>                                                                     | • Significant inhibition of MRSA, V, R, M, and T biofilm formation    | Yes                                |
| E4      | • Inhibition of <i>M. luteus</i>                                                                     | • Significant inhibition of MRSA, V, R, M, and E biofilm formation    | Yes                                |
| E6      | • Inhibition of <i>M. luteus</i>                                                                     | • Significant inhibition of MRSA, R, M, T, and E biofilm formation    | Yes                                |
| E54     | • Inhibition of <i>M. luteus</i> and MRSA E                                                          | • Significant inhibition of MRSA, R, M, and E biofilm formation       | Yes                                |
| E67     | • Inhibition of <i>M. luteus</i> and MRSA strains C, D, E, G, H, I, K, L, M, N, P, R, T, W, U and V. | • Significant inhibition of MRSA, V, R, M, T, and E biofilm formation | Yes                                |
| E89     | • Inhibition of <i>M. luteus</i>                                                                     | • Significant inhibition of MRSA R, M, T, and E biofilm formation     | Yes                                |
| E96     | • Inhibition of <i>M. luteus</i>                                                                     | • Significant inhibition of MRSA R, M, T, and E biofilm formation     | Yes                                |
| E99     | • Inhibition of <i>M. luteus</i>                                                                     | • Significant inhibition of MRSA V, R, T, and E biofilm formation     | Yes                                |
| E100    | • Inhibition of <i>M. luteus</i>                                                                     | • Significant inhibition of MRSA V, R, T, and E biofilm formation     | Yes                                |
| E170    | • Inhibition of <i>M. luteus</i> and MRSA W                                                          | • Significant inhibition of MRSA R, M, T, and E biofilm formation     | Yes                                |



**Table S.2.** Genomic information obtained following the sequencing of 11 shortlisted CoNS isolates by Microbes NG (Birmingham, UK). The quality of the sequenced genomes was determined through QUAST and CheckM, and sequence coverage was determined using Bowtie2 and SAMtools.

| Isolate                      | E99     | E100    | E89     | E54     | E6      | E67     | E170    | E96     | C33     | E4      | C14     |
|------------------------------|---------|---------|---------|---------|---------|---------|---------|---------|---------|---------|---------|
| # contigs<br>(≥ 0 bp)        | 57      | 60      | 59      | 63      | 57      | 67      | 55      | 38      | 63      | 47      | 50      |
| # contigs<br>(≥ 1000 bp)     | 34      | 30      | 25      | 31      | 31      | 31      | 14      | 12      | 31      | 14      | 41      |
| # contigs<br>(≥ 5000 bp)     | 26      | 23      | 20      | 25      | 26      | 23      | 11      | 8       | 25      | 9       | 33      |
| # contigs<br>(≥ 10000 bp)    | 23      | 21      | 19      | 24      | 22      | 22      | 10      | 8       | 21      | 9       | 28      |
| # contigs<br>(≥ 25000 bp)    | 21      | 17      | 17      | 20      | 18      | 19      | 7       | 7       | 18      | 8       | 17      |
| # contigs<br>(≥ 50000 bp)    | 15      | 15      | 15      | 15      | 16      | 15      | 6       | 5       | 13      | 6       | 6       |
| Total length<br>(≥ 0 bp)     | 2412971 | 2559883 | 2409487 | 2425182 | 2481282 | 2522476 | 2526178 | 2496969 | 2497126 | 2501795 | 2538711 |
| Total length<br>(≥ 1000 bp)  | 2406443 | 2550413 | 2399860 | 2414828 | 2472909 | 2512185 | 2512249 | 2490011 | 2489002 | 2491656 | 2526700 |
| Total length<br>(≥ 5000 bp)  | 2386294 | 2534389 | 2392622 | 2400335 | 2456720 | 2489047 | 2506724 | 2484166 | 2472606 | 2481984 | 2399831 |
| Total length<br>(≥ 10000 bp) | 2361944 | 2517992 | 2386134 | 2391111 | 2424377 | 2480528 | 2501709 | 2484166 | 2442951 | 2481984 | 2300217 |
| Total length<br>(≥ 25000 bp) | 2323091 | 2451900 | 2357906 | 2318469 | 2368133 | 2432970 | 2439135 | 2464006 | 2407536 | 2458154 | 2199981 |
| Total length<br>(≥ 50000 bp) | 2116033 | 2371329 | 2270246 | 2143095 | 2281372 | 2283867 | 2399820 | 2395255 | 2209510 | 2393212 | 2176311 |
| # contigs                    | 35      | 34      | 28      | 35      | 36      | 35      | 18      | 14      | 33      | 16      | 44      |
| Largest contig               | 284537  | 465573  | 490174  | 280833  | 328253  | 443168  | 726371  | 1118993 | 502608  | 899999  | 356753  |
| Total length                 | 2407414 | 2553246 | 2401913 | 2417951 | 2476147 | 2514912 | 2515531 | 2491238 | 2490242 | 2492844 | 2273229 |
| GC (%)                       | 32      | 31.92   | 32.09   | 32.03   | 31.99   | 31.91   | 32.78   | 32.83   | 31.91   | 32.8    | 31.37   |

|                      |          |          |          |          |          |          |          |          |          |          |          |
|----------------------|----------|----------|----------|----------|----------|----------|----------|----------|----------|----------|----------|
| <b>N50</b>           | 147472   | 201293   | 173367   | 139835   | 181306   | 185285   | 694797   | 904609   | 199479   | 564903   | 199432   |
| <b>N90</b>           | 39240    | 51665    | 75394    | 40238    | 55244    | 51433    | 141193   | 116844   | 47523    | 134308   | 50345    |
| <b>auN</b>           | 156013.8 | 220461.9 | 212228.9 | 157055.8 | 169196.7 | 217089.9 | 556877.9 | 851925.4 | 244154.6 | 565060.2 | 234561.5 |
| <b>L50</b>           | 6        | 5        | 5        | 6        | 6        | 5        | 2        | 2        | 4        | 2        | 5        |
| <b>L90</b>           | 17       | 14       | 14       | 16       | 16       | 15       | 5        | 4        | 14       | 5        | 10       |
| <b># N's per 100</b> |          |          |          |          |          |          |          |          |          |          |          |
| <b>kbp</b>           | 0        | 0        | 0        | 0        | 0        | 0        | 0        | 0        | 0        | 0        | 0        |
| <b>Contamination</b> | 0        | 0        | 0.37     | 0        | 0        | 0        | 0.13     | 0.66     | 0.1      | 0.08     | 0        |
| <b>heterogeneity</b> | 0        | 0        | 50       | 0        | 0        | 0        | 33.33    | 0        | 0        | 0        | 0        |
| <b>coverage</b>      | 93.0481  | 128.955  | 31.2918  | 82.7517  | 127.613  | 112.873  | 103.935  | 101.033  | 112.492  | 128.3    | 128      |

---
